# Supplementary material for: One-Pot Synthesis of Nitrogen-Doped TiO2 with Supported Copper Nanocrystalline for Photocatalytic Environment Purification under Household White LED Lamp
Source: MDPI journal article supplement (doi:10.3390/molecules26206221), 2021-10-14
Supplement: s1 [file s1]

## Supplementary Materials

### **One-Pot Synthesis of Nitrogen doped TiO<sub>2</sub> with Supported Copper Nanocrystalline for Photocatalytic Environment Purification under Household White LED Lamp**

Yixiao Pan,<sup>a</sup> Yifei Wang,<sup>a</sup> Shimiao Wu,<sup>a</sup> Yating Chen,<sup>b</sup> Xiang-Rong Zheng,<sup>b</sup>  
Ning Zhang<sup>a, c, \*</sup>

<sup>a</sup> School of Materials Science and Engineering, Central South University, Changsha 410083, Hunan, P. R. China.

Email: nzhang@csu.edu.cn

<sup>b</sup> Department of Pediatrics, Xiangya Hospital, Central South University, 87 Xiangya Road, Changsha 410008, Hunan, P. R. China.

<sup>c</sup> Guangdong Provincial Key Laboratory of Technique and Equipment for Macromolecular Advanced Manufacturing, South China University of Technology, Guangzhou 510640, Guangdong, P. R. China

## Additional Figures and Captions

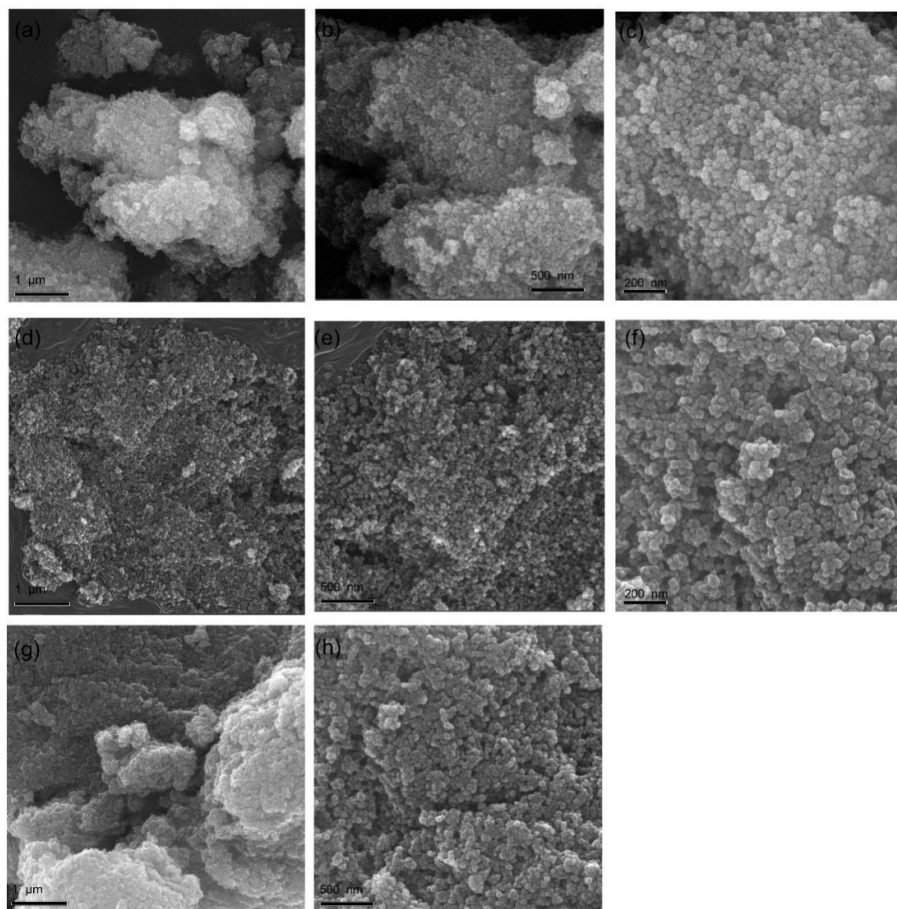

**Figure S1** SEM images of (a-c) pristine  $\text{TiO}_2$ , (d-f) N- $\text{TiO}_2$ , and (g-h) 1%Cu-N- $\text{TiO}_2$ .

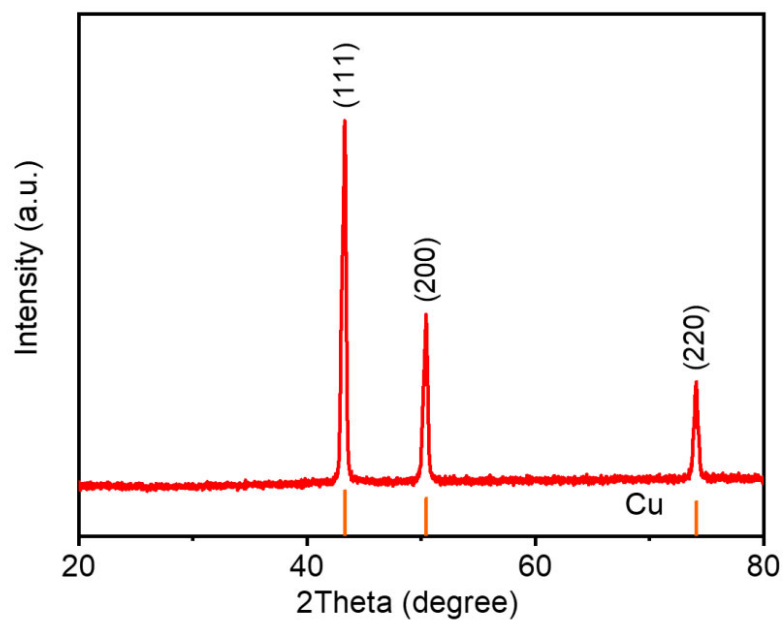

**Figure S2** XRD pattern of product by nitridizing  $\text{Cu}(\text{NO}_3)_2 \cdot 3\text{H}_2\text{O}$  powder under 773 K for about 3 h under  $\text{NH}_3$  gas atmosphere.

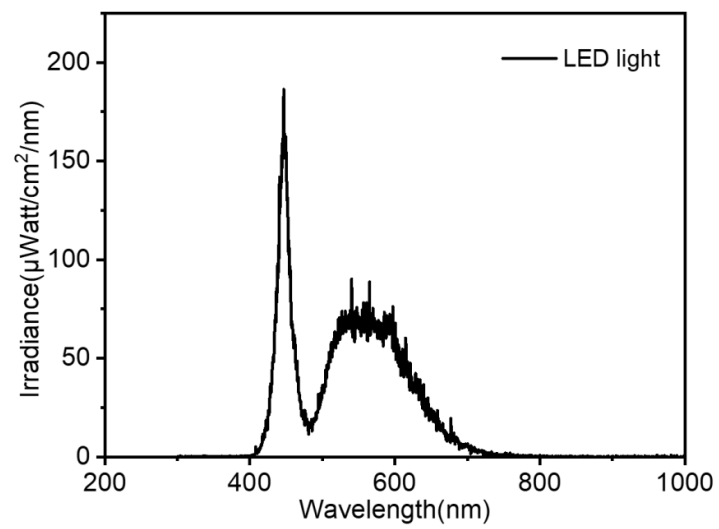

**Figure S3** The irradiation spectrum of used white LED lamp.

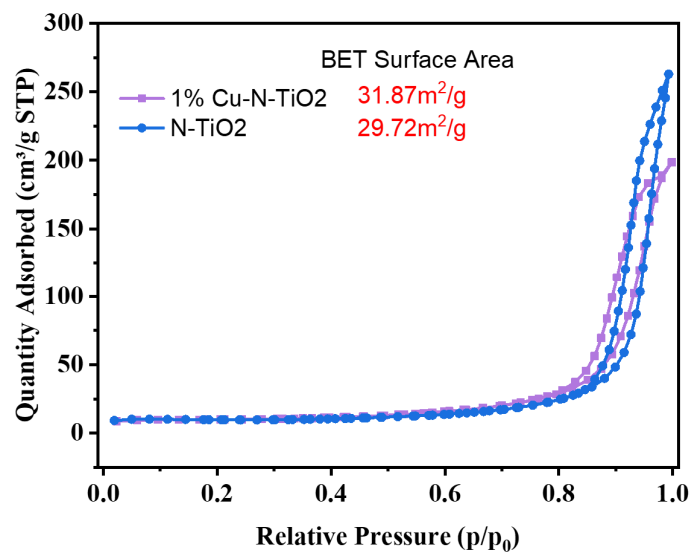

**Figure S4** Nitrogen adsorption-desorption isotherms and calculated BET specific surface areas of the 1%Cu-N-TiO<sub>2</sub> and N-TiO<sub>2</sub>.

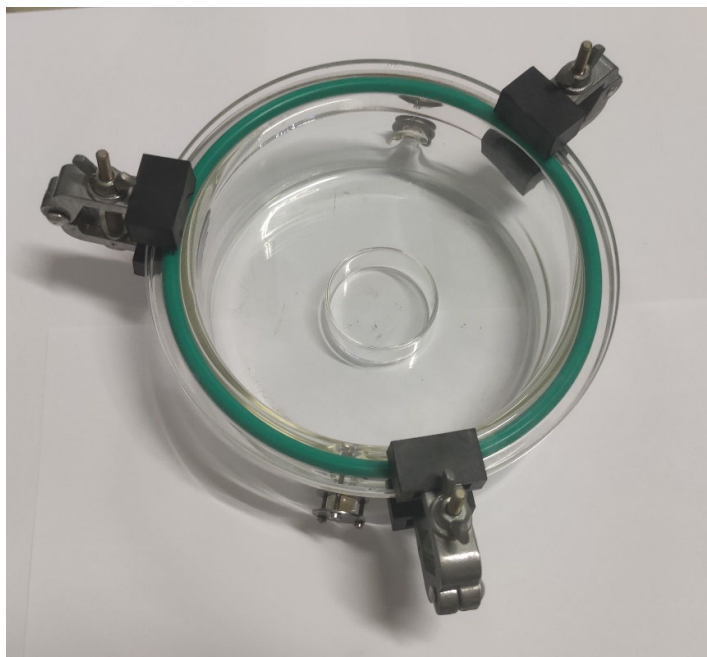

**Figure S5** The reaction cell used for isopropanol degradation experiments.

**Table S1** XPS element content analysis of 1% Cu-N-TiO<sub>2</sub>

| Name     | O 1s  | N 1s | C 1s | Ti 2p | Cu 2p |
|----------|-------|------|------|-------|-------|
| Atomic % | 54.79 | 0.81 | 16.9 | 26.83 | 0.68  |
